# Supplementary material
Source: ML conference proceedings conference paper supplement (https://proceedings.mlr.press/v95/zha18a.html)
Supplement: Supplementary file [file zha18a-supp.pdf]

## Supplementary Material: Joint Patch-Group Based Sparse Representation for Image Inpainting

Zhiyuan Zha<sup>1,2</sup>  
 Xin Yuan<sup>3</sup>  
 Bihan Wen<sup>4</sup>  
 Jiantao Zhou<sup>5</sup>  
 Ce Zhu<sup>1</sup> \*

ZHAZHIYUAN.MMD@GMAIL.COM  
 XYUAN@BELL-LABS.COM  
 BWEN3@ILLINOIS.EDU  
 JTZHOU@UMAC.MO  
 ECZHU@UESTC.EDU.CN

<sup>1</sup> School of Information and Communication Engineering, University of Electronic Science and Technology of China, Chengdu, 611731, China.

<sup>2</sup> School of Electronic Science and Engineering, Nanjing University, Nanjing, 210023, China.

<sup>3</sup> Nokia Bell Labs, 600 Mountain Avenue, Murray Hill, NJ, 07974, USA.

<sup>4</sup> Department of Electrical and Computer Engineering, Univerisity of Illinois at Urbana-Champaign, Urbana, IL, 61801, USA.

<sup>5</sup> Department of Computer and Information Science, University of Macau, Macau 999078, China.

**Editors:** Jun Zhu and Ichiro Takeuchi

To further verify the feasibility of the proposed joint patch-group based sparse representation (JPG-SR) model, we have applied it to another two low-level vision tasks, i.e., image deblocking and image compressive sensing (CS) recovery.

Particularly, in image deblocking, we verify the proposed algorithm for restoring JPEG-compressed images on 14 widely used images shown in Fig. 1.

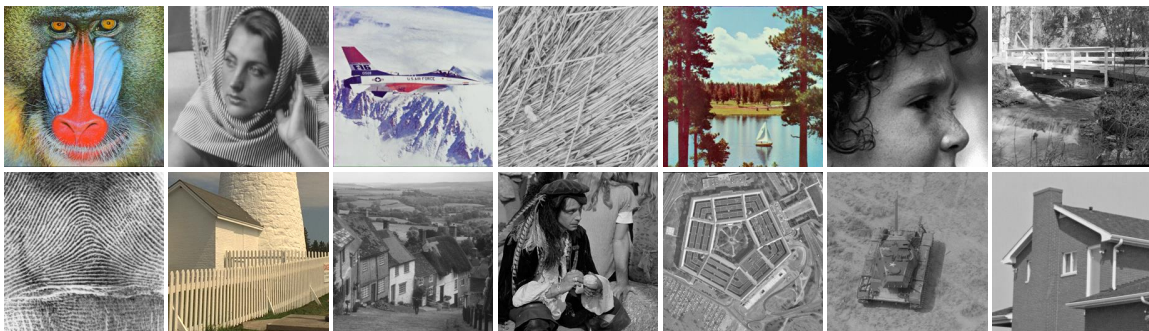

Figure 1: Test images used in the image deblocking. Top row: from left to right, Bagoon, Barbara, Airplane, Straw, Lake, Girl, Bridge; bottom row: from left to right, Fingerprint, Fence, Goldhill, Man, Pentagon, Tank, House.

\* Corresponding Author. This work was supported by the NSFC (61571102) and the applied research programs of science and technology., Sichuan Province (No. 2018JY0035). The first two authors contributed to this work equally.

We compare the proposed JPG-SR with advanced image deblocking methods including SA-DCT (Foi et al., 2007), ANCE (Zhang et al., 2013c), BM3D (Dabov et al., 2007), WNNM (Gu et al., 2014) and SSR-QC (Zhao et al., 2017). Note that BM3D and WNNM are the well-known image restoration methods that deliver state-of-the-art denoising results. SA-DCT, ANCE and SSR-QC are the state-of-the-art deblocking methods and SSR-QC utilize the group sparse representation for image deblocking. The PSNR and SSIM result comparisons for all test images in the case of quality factor (QF) =1, 5, 10, 20, 30 and 40 are shown in Table 1 and Table 2, respectively. The proposed JPG-SR achieves {1.32dB, 0.46dB, 0.29dB, 0.48dB, 0.30dB and 0.19dB} gains in PSNR and {0.0361, 0.0141, 0.0119, 0.0138, 0.0147 and 0.0096} gains in SSIM over SA-DCT, ANCE, BM3D, WNNM and SSR-QC on average, respectively.

The visual quality comparisons in the case of QF =1 for image *Fence* and *Airplane* are demonstrated in Fig. 2 to Fig. 3, respectively. One can observe that the blocking artifacts are obvious in the images reconstructed directly by the standard JPEG decoder. SA-DCT, ANCE, BM3D and WNNM methods can only suppress the blocking artifacts partially, but many blocking artifacts are still visible in the reconstructed image. SSR-QC usually generate better results than JPEG, SA-DCT, ANCE, BM3D and WNNM methods. However, it often produces noticeable zigzag artifacts and blur effects along image edges. By contrast, the proposed JPG-SR not only removes blocking or ringing artifacts across the image, but also preserves large-scale sharp edges and small-scale fine image details.

In image CS recovery, we verify the proposed algorithm for image CS recovery on 14 widely used images shown in Fig. 4. We compare the proposed JPG-SR with eight other competing methods including BCS (Mun and Fowler, 2009), MH (Chen et al., 2011), TV-NLR (Zhang et al., 2013a), RCOS (Zhang et al., 2012), ALSB (Zhang et al., 2014), SGSR (Zhang et al., 2013b), NGS (Liu et al., 2017) and PMDSE (Wu et al., 2017). Note that ALSB is the PSR-based method, while RCOS, SGSR and NGS methods are the GSR-based methods. The PSNR results are shown in Table 3. One can observe that the proposed JPG-SR consistently outperforms other competing methods (The only exception is the image *House* and *Parrot* with  $0.4N$  measurements for which ALSB and SGSR slightly outperform the proposed JPG-SR, respectively.). In terms of PSNR, the proposed JPG-SR achieves {4.91dB, 2.80dB, 3.65dB, 1.65dB, 1.05dB, 0.89dB, 2.41dB and 5.33dB} improvement in average over BCS, MH, TV-NLR, RCOS, ALSB, SGSR, NGS and PMDSE, respectively. The SSIM results are shown in Table 4. It can be seen that the proposed JPG-SR outperforms the other competing methods in most case. The average gains of the proposed JPG-SR over BCS, MH, TV-NLR, RCOS, ALSB, SGSR, NGS and PMDSE methods are as much as {0.1340, 0.0590, 0.0749, 0.0361, 0.0135, 0.0134, 0.0614 and 0.1046}, respectively. The visual comparisons of image *Leaves*, image *Monarch* and image *Starfish* with  $0.1N$  measurements are shown in Fig. 5, Fig. 6 and Fig. 7, respectively. One can observe that BCS and PMDSE methods cannot obtain the well perceptual results. The MH, TV-NLR, RCOS, ALSB, SGSR and NGS methods still suffer from some undesirable artifacts or over-smooth phenomena. By contrast, the proposed JPG-SR not only removes most of the visual artifacts, but also preserves large-scale sharp edges and small-scale fine image details.

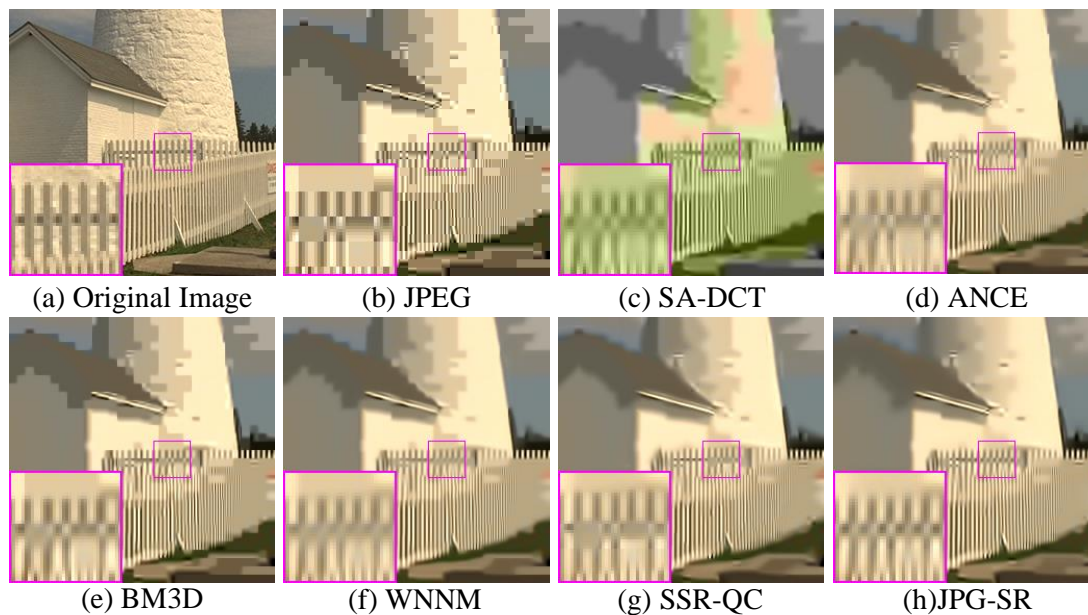

Figure 2: Visual comparison of *Fence* for image deblocking with  $QF = 1$ . (a) Original image; (b) JPEG (PSNR = 21.63dB, SSIM = 0.6240 ); (c) SA-DCT (PSNR = 22.80dB, SSIM = 0.6604); (d) ANCE (PSNR = 22.91dB, SSIM = 0.6576); (e) BM3D (PSNR = 22.56dB, SSIM = 0.6532); (f) WNNM (PSNR = 23.17dB, SSIM = 0.6670); (g) SSR-QC (PSNR= 23.19dB, SSIM = 0.6699); (h) JPG-SR (PSNR= **23.61dB**, SSIM = **0.6869**).

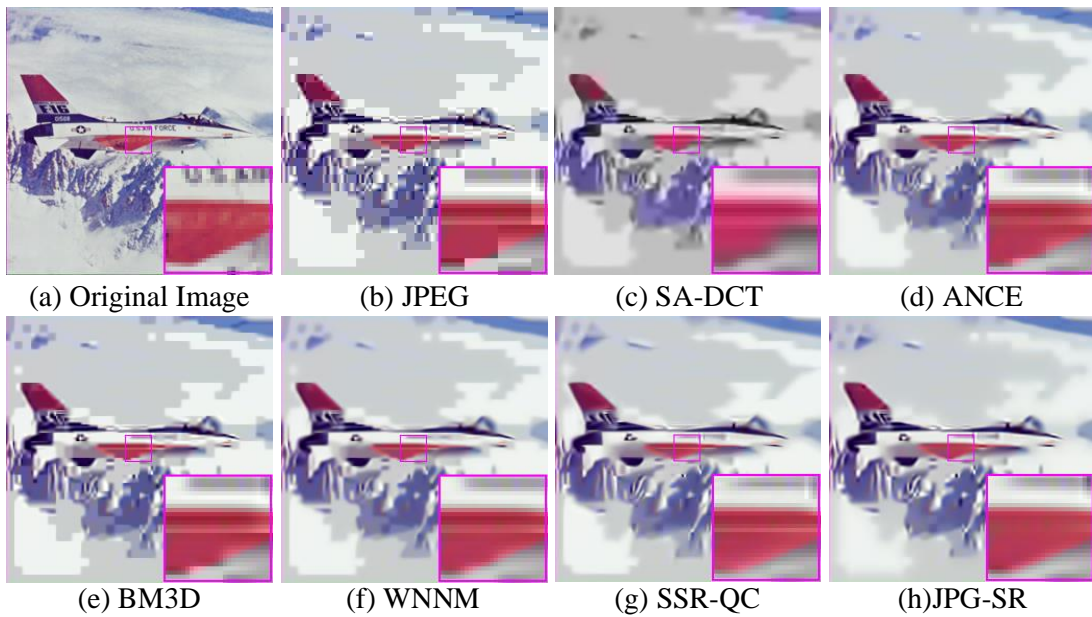

Figure 3: Visual comparison of *Airplane* for image deblocking with  $QF = 1$ . (a) Original image; (b) JPEG (PSNR = 22.01dB, SSIM = 0.6601 ); (c) SA-DCT (PSNR = 23.27dB, SSIM = 0.7298); (d) ANCE (PSNR = 23.25dB, SSIM = 0.7269); (e) BM3D (PSNR = 22.97dB, SSIM = 0.7040); (f) WNNM (PSNR = 23.31dB, SSIM = 0.7220); (g) SSR-QC (PSNR = 23.22dB, SSIM = 0.7235); (h) JPG-SR (PSNR= **23.67dB**, SSIM = **0.7495**).

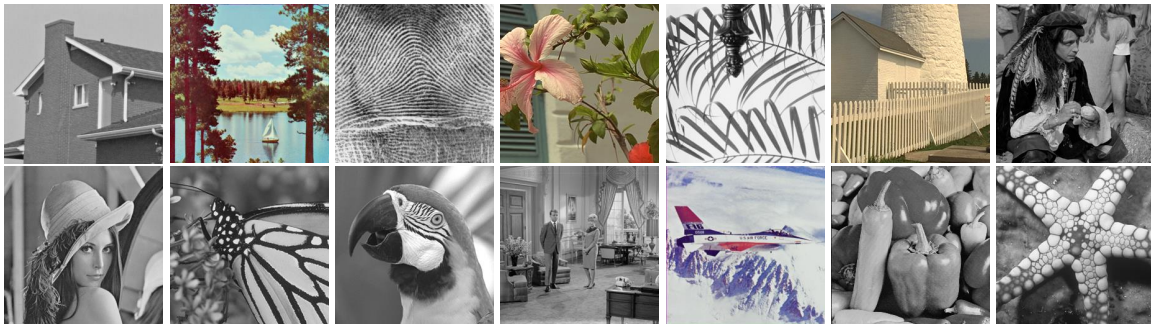

Figure 4: Test images used in the image CS recovery. Top row: from left to right, House, Lake, Fingerprint, Flower, Leaves, Fence, Man; bottom row: from left to right, Lena, Monarch, Parrot, Couple, Airplane, Peppers, Starfish.

Table 1: PSNR (dB) comparison of JPEG, SA-DCT, ANCE, BM3D, WNNM, SSR-QC and JPG-SR for image deblocking.

| QF | Methods | Airplane     | Bahoon       | Barbara      | Bridge       | Fence        | Fingerprint  | Girl         | Goldhill     | House        | Lake         | Man          | Tank         | Pentagon     | Straw        | Average      |
|----|---------|--------------|--------------|--------------|--------------|--------------|--------------|--------------|--------------|--------------|--------------|--------------|--------------|--------------|--------------|--------------|
| 1  | JPEG    | 22.01        | 21.05        | 21.92        | 20.94        | 21.63        | 18.32        | 25.34        | 22.92        | 25.00        | 20.98        | 21.45        | 24.26        | 20.77        | 18.72        | 21.81        |
|    | SA-DCT  | 23.27        | 21.79        | 23.30        | 21.99        | 22.80        | 19.55        | 27.05        | 24.19        | 26.61        | 22.16        | 22.71        | 25.88        | 21.80        | 19.54        | 23.05        |
|    | ANCE    | 28.32        | 25.13        | 27.98        | 33.65        | 25.38        | 21.49        | 26.33        | 25.56        | 30.64        | 30.48        | 26.30        | 24.50        | 25.14        | 22.71        | 26.68        |
|    | BM3D    | 22.97        | 21.52        | 22.97        | 21.72        | 22.56        | 19.69        | 26.20        | 23.73        | 26.23        | 21.84        | 22.45        | 24.96        | 21.68        | 19.56        | 22.72        |
|    | WNNM    | 23.31        | 21.72        | 23.45        | 21.89        | 23.17        | 20.27        | 27.11        | 24.11        | 26.97        | 22.16        | 22.70        | 25.74        | 21.92        | 19.63        | 23.15        |
|    | SSR-QC  | 23.22        | 21.78        | 23.79        | 21.83        | 23.19        | 20.54        | 27.09        | 24.10        | 27.00        | 22.04        | 22.53        | 25.89        | 22.00        | 19.86        | 23.20        |
|    | JPG-SR  | <b>23.67</b> | <b>21.81</b> | <b>24.00</b> | <b>22.02</b> | <b>23.61</b> | <b>20.65</b> | <b>27.55</b> | <b>24.22</b> | <b>27.45</b> | <b>22.35</b> | <b>22.82</b> | <b>26.70</b> | <b>22.20</b> | <b>19.97</b> | <b>23.50</b> |
| 5  | JPEG    | 24.70        | 22.65        | 23.85        | 22.99        | 23.54        | 20.69        | 27.92        | 25.47        | 27.76        | 23.64        | 23.84        | 27.26        | 23.03        | 20.99        | 24.17        |
|    | SA-DCT  | 23.27        | 21.79        | 23.30        | 21.99        | 22.80        | 19.55        | 27.05        | 24.19        | 26.61        | 22.16        | 22.71        | 25.88        | 21.80        | 19.54        | 23.05        |
|    | ANCE    | 28.32        | 25.13        | 27.98        | 33.65        | 25.38        | 21.49        | 26.33        | 25.56        | 30.64        | 30.48        | 26.30        | 24.50        | 25.14        | 22.71        | 26.68        |
|    | BM3D    | 22.97        | 21.52        | 22.97        | 21.72        | 22.56        | 19.69        | 26.20        | 23.73        | 26.23        | 21.84        | 22.45        | 24.96        | 21.68        | 19.56        | 22.72        |
|    | WNNM    | 23.31        | 21.72        | 23.45        | 21.89        | 23.17        | 20.27        | 27.11        | 24.11        | 26.97        | 22.16        | 22.70        | 25.74        | 21.92        | 19.63        | 23.15        |
|    | SSR-QC  | 23.22        | 21.78        | 23.79        | 21.83        | 23.19        | 20.54        | 27.09        | 24.10        | 27.00        | 22.04        | 22.53        | 25.89        | 22.00        | 19.86        | 23.20        |
|    | JPG-SR  | <b>23.67</b> | <b>21.81</b> | <b>24.00</b> | <b>22.02</b> | <b>23.61</b> | <b>20.65</b> | <b>27.55</b> | <b>24.22</b> | <b>27.45</b> | <b>22.35</b> | <b>22.82</b> | <b>26.70</b> | <b>22.20</b> | <b>19.97</b> | <b>23.50</b> |
| 10 | JPEG    | 27.48        | 24.49        | 26.28        | 25.23        | 25.90        | 23.75        | 30.59        | 28.09        | 30.55        | 26.26        | 26.19        | 29.51        | 25.50        | 23.46        | 26.66        |
|    | SA-DCT  | 28.71        | 25.00        | 27.36        | <b>25.88</b> | 26.78        | 24.51        | 31.46        | 29.00        | 32.09        | 27.32        | 27.08        | 30.15        | 26.35        | 24.31        | 27.57        |
|    | ANCE    | 28.63        | 25.02        | 27.77        | 25.88        | 27.19        | <b>25.19</b> | 31.58        | 29.02        | 32.11        | 27.16        | 27.05        | 30.31        | 26.51        | 24.57        | 27.71        |
|    | BM3D    | 28.50        | 25.02        | 27.52        | 25.87        | 26.90        | 24.77        | 31.58        | 29.03        | 32.08        | 27.19        | 27.04        | 30.30        | 26.55        | 24.42        | 27.63        |
|    | WNNM    | 28.77        | 24.98        | 27.81        | 25.79        | 27.13        | 25.14        | 31.40        | 28.95        | 32.43        | <b>27.38</b> | 27.04        | 30.04        | 26.63        | 24.70        | 27.73        |
|    | SSR-QC  | 28.74        | 24.84        | 28.48        | 25.60        | 27.48        | 25.15        | 31.46        | 28.88        | 32.85        | 27.19        | 27.01        | 30.08        | 26.71        | 24.80        | 27.81        |
|    | JPG-SR  | <b>28.91</b> | <b>25.03</b> | <b>28.83</b> | 25.87        | <b>27.60</b> | 25.13        | <b>31.65</b> | <b>29.15</b> | <b>32.89</b> | 27.37        | <b>27.10</b> | <b>30.34</b> | <b>26.79</b> | <b>24.86</b> | <b>27.97</b> |
| 20 | JPEG    | 30.11        | 26.30        | 29.34        | 27.33        | 28.47        | 26.38        | 32.83        | 30.50        | 33.00        | 28.68        | 28.41        | 31.73        | 27.65        | 25.74        | 29.03        |
|    | SA-DCT  | 31.10        | 26.71        | 30.36        | 27.92        | 29.38        | 26.89        | 33.37        | 31.27        | 34.12        | 29.59        | 29.20        | 32.13        | 28.32        | 26.37        | 29.77        |
|    | ANCE    | 31.09        | 26.72        | 31.27        | 27.85        | 29.71        | 27.47        | 33.60        | 31.29        | 34.30        | 29.46        | 29.17        | 32.37        | 28.48        | 26.84        | 29.97        |
|    | BM3D    | 30.96        | 26.71        | 30.70        | 27.88        | 29.47        | 27.11        | 33.56        | 31.31        | 34.29        | 29.50        | 29.14        | 32.35        | 28.46        | 26.46        | 29.85        |
|    | WNNM    | 31.20        | 26.76        | 31.09        | 27.92        | 29.68        | 27.48        | 33.27        | 31.26        | 34.41        | 29.72        | 29.23        | 31.96        | 28.61        | 26.82        | 29.96        |
|    | SSR-QC  | 31.20        | 26.63        | 31.86        | 27.73        | 29.95        | 27.49        | 33.37        | 31.22        | <b>34.76</b> | 29.62        | 29.18        | 32.12        | <b>28.69</b> | 26.99        | 30.06        |
|    | JPG-SR  | <b>31.36</b> | <b>26.81</b> | <b>31.95</b> | <b>27.95</b> | <b>29.95</b> | <b>27.54</b> | <b>33.64</b> | <b>31.46</b> | 34.66        | <b>29.76</b> | <b>29.27</b> | <b>32.42</b> | 28.67        | <b>27.11</b> | <b>30.18</b> |
| 30 | JPEG    | 31.52        | 27.38        | 31.20        | 28.51        | 30.04        | 27.78        | 33.98        | 31.87        | 34.18        | 30.08        | 29.67        | 32.97        | 28.84        | 27.03        | 30.36        |
|    | SA-DCT  | 32.42        | 27.75        | 32.10        | 29.04        | 30.87        | 28.17        | 34.38        | 32.58        | 35.09        | 30.87        | 30.38        | 33.30        | 29.42        | 27.53        | 30.99        |
|    | ANCE    | 32.48        | 27.82        | 33.10        | 29.00        | 31.16        | 28.81        | 34.61        | 32.61        | 35.39        | 30.82        | 30.37        | 33.52        | 29.61        | 28.16        | 31.25        |
|    | BM3D    | 32.31        | 27.75        | 32.46        | 29.01        | 30.94        | 28.37        | 34.54        | 32.64        | 35.23        | 30.81        | 30.32        | 33.48        | 29.53        | 27.62        | 31.07        |
|    | WNNM    | 32.55        | 27.85        | 32.83        | 29.11        | 31.16        | 28.73        | 34.25        | 32.65        | 35.26        | 31.05        | 30.47        | 33.15        | 29.74        | 28.01        | 31.20        |
|    | SSR-QC  | 32.68        | 27.74        | 33.49        | 28.97        | 31.40        | 28.84        | 34.40        | 32.59        | 35.73        | 31.03        | 30.44        | 33.26        | 29.82        | 28.22        | 31.33        |
|    | JPG-SR  | <b>32.81</b> | <b>27.91</b> | <b>33.96</b> | <b>29.15</b> | <b>31.58</b> | <b>28.94</b> | <b>34.62</b> | <b>32.78</b> | <b>35.73</b> | <b>31.15</b> | <b>30.53</b> | <b>33.56</b> | <b>29.84</b> | <b>28.50</b> | <b>31.50</b> |
| 40 | JPEG    | 32.58        | 28.21        | 32.51        | 29.36        | 31.11        | 28.76        | 34.78        | 32.82        | 35.04        | 31.03        | 30.55        | 33.78        | 29.65        | 27.96        | 31.30        |
|    | SA-DCT  | 33.37        | 28.54        | 33.33        | 29.84        | 31.89        | 29.09        | 35.14        | 33.50        | 35.81        | 31.77        | 31.21        | 34.16        | 30.18        | 28.38        | 31.87        |
|    | ANCE    | 33.52        | 28.73        | 34.44        | 29.86        | 32.12        | 29.75        | 35.38        | 33.58        | 36.15        | 31.76        | 31.28        | 34.34        | 30.42        | 29.12        | 32.17        |
|    | BM3D    | 33.30        | 28.54        | 33.71        | 29.82        | 31.95        | 29.26        | 35.29        | 33.55        | 35.95        | 31.73        | 31.16        | 34.30        | 30.28        | 28.47        | 31.95        |
|    | WNNM    | 33.51        | 28.67        | 34.09        | 29.96        | 32.16        | 29.60        | 35.05        | 33.62        | 35.89        | 31.97        | 31.32        | 34.08        | 30.51        | 28.84        | 32.09        |
|    | SSR-QC  | 33.73        | 28.62        | 35.04        | 29.81        | 32.48        | 29.83        | 35.11        | 33.51        | 36.48        | 32.03        | 31.32        | 34.02        | 30.66        | 29.20        | 32.28        |
|    | JPG-SR  | <b>33.83</b> | <b>28.81</b> | <b>35.12</b> | <b>30.00</b> | <b>32.53</b> | <b>29.91</b> | <b>35.38</b> | <b>33.74</b> | <b>36.51</b> | <b>32.13</b> | <b>31.47</b> | <b>34.36</b> | <b>30.69</b> | <b>29.43</b> | <b>32.42</b> |



Table 2: SSIM comparison of JPEG, SA-DCT, ANCE, BM3D, WNNM, SSR-QC and JPG-SR for image deblocking.

| QF     | Methods       | Airplane      | Bahoon        | Barbara       | Bridge        | Fence         | Fingerprint   | Girl          | Goldhill      | House         | Lake          | Man           | Tank          | Pentagon      | Straw         | Average |
|--------|---------------|---------------|---------------|---------------|---------------|---------------|---------------|---------------|---------------|---------------|---------------|---------------|---------------|---------------|---------------|---------|
| 1      | JPEG          | 0.6601        | 0.3491        | 0.5284        | 0.4248        | 0.6240        | 0.6007        | 0.4702        | 0.4993        | 0.7202        | 0.5773        | 0.4902        | 0.4928        | 0.4160        | 0.3890        | 0.5173  |
|        | SA-DCT        | 0.7298        | 0.3747        | 0.6086        | 0.4653        | 0.6604        | 0.6134        | 0.5498        | 0.5691        | 0.7708        | 0.6441        | 0.5514        | 0.5785        | 0.4464        | 0.3620        | 0.5660  |
|        | ANCE          | 0.7269        | 0.3726        | 0.6050        | 0.4566        | 0.6576        | 0.6264        | 0.5860        | 0.5618        | 0.7686        | 0.6392        | 0.5522        | 0.5773        | 0.4419        | 0.3728        | 0.5675  |
|        | BM3D          | 0.7040        | 0.3649        | 0.5806        | 0.4577        | 0.6532        | 0.6397        | 0.5061        | 0.5397        | 0.7563        | 0.6216        | 0.5379        | 0.5332        | 0.4548        | 0.3931        | 0.5531  |
|        | WNNM          | 0.7220        | 0.3683        | 0.6098        | 0.4557        | 0.6670        | 0.6434        | 0.5805        | 0.5579        | 0.7754        | 0.6367        | 0.5562        | 0.5627        | 0.4472        | 0.3577        | 0.5672  |
|        | SSR-QC        | 0.7235        | 0.3750        | 0.6335        | 0.4552        | 0.6699        | 0.6717        | 0.5249        | 0.5608        | 0.7756        | 0.6354        | 0.5337        | 0.5744        | 0.4597        | 0.4185        | 0.5723  |
| JPG-SR | <b>0.7495</b> | <b>0.3787</b> | <b>0.6406</b> | <b>0.4686</b> | <b>0.6869</b> | <b>0.6831</b> | <b>0.6413</b> | <b>0.5714</b> | <b>0.7890</b> | <b>0.6612</b> | <b>0.5745</b> | <b>0.5887</b> | <b>0.4729</b> | <b>0.4370</b> | <b>0.5960</b> |         |
| 5      | JPEG          | 0.7518        | 0.5109        | 0.6563        | 0.5797        | 0.6974        | 0.7559        | 0.6462        | 0.6435        | 0.7733        | 0.6999        | 0.6377        | 0.6075        | 0.5870        | 0.6207        | 0.6548  |
|        | SA-DCT        | 0.8138        | 0.5003        | 0.7124        | 0.5918        | 0.7286        | 0.7651        | 0.7141        | 0.6911        | 0.8144        | 0.7595        | 0.6770        | 0.6361        | 0.6010        | 0.6292        | 0.6882  |
|        | ANCE          | 0.8128        | 0.5085        | 0.7132        | 0.5923        | 0.7327        | 0.7781        | 0.7126        | 0.6882        | 0.8143        | 0.7546        | 0.6745        | 0.6392        | 0.6064        | 0.6224        | 0.6893  |
|        | BM3D          | 0.7953        | 0.5163        | 0.7071        | 0.5984        | 0.7274        | 0.7813        | 0.7005        | 0.6882        | 0.8084        | 0.7481        | 0.6784        | 0.6375        | 0.6217        | 0.6470        | 0.6897  |
|        | WNNM          | 0.8049        | 0.4906        | 0.7107        | 0.5769        | 0.7307        | 0.7779        | 0.7052        | 0.6833        | 0.8180        | 0.7544        | 0.6694        | 0.6347        | 0.6037        | 0.6327        | 0.6852  |
|        | SSR-QC        | 0.8106        | 0.5082        | 0.7309        | 0.5843        | 0.7481        | 0.7879        | 0.7145        | 0.6854        | 0.8226        | 0.7549        | 0.6723        | 0.6388        | 0.6265        | 0.6537        | 0.6956  |
| JPG-SR | <b>0.8254</b> | <b>0.5223</b> | <b>0.7448</b> | <b>0.6030</b> | <b>0.7572</b> | <b>0.8022</b> | <b>0.7196</b> | <b>0.7004</b> | <b>0.8284</b> | <b>0.7688</b> | <b>0.6795</b> | <b>0.6463</b> | <b>0.6422</b> | <b>0.6780</b> | <b>0.7084</b> |         |
| 10     | JPEG          | 0.8280        | 0.6695        | 0.7901        | 0.7237        | 0.7878        | 0.8714        | 0.7456        | 0.7628        | 0.8183        | 0.7998        | 0.7493        | 0.7056        | 0.7337        | 0.7724        | 0.7684  |
|        | SA-DCT        | 0.8748        | 0.6621        | 0.8300        | 0.7280        | 0.8043        | 0.8803        | 0.7698        | 0.7857        | 0.8494        | 0.8464        | 0.7745        | 0.7135        | 0.7493        | 0.7885        | 0.7898  |
|        | ANCE          | 0.8758        | 0.6603        | 0.8290        | 0.7274        | 0.8108        | 0.8863        | 0.7753        | 0.7874        | 0.8515        | 0.8417        | 0.7763        | 0.7263        | 0.7526        | 0.7903        | 0.7922  |
|        | BM3D          | 0.8660        | <b>0.6714</b> | 0.8341        | <b>0.7334</b> | 0.8100        | 0.8865        | <b>0.7770</b> | 0.7910        | 0.8494        | 0.8422        | 0.7788        | 0.7282        | 0.7618        | 0.7972        | 0.7948  |
|        | WNNM          | 0.8720        | 0.6511        | 0.8365        | 0.7120        | 0.8081        | <b>0.8879</b> | 0.7649        | 0.7780        | 0.8534        | 0.8461        | 0.7666        | 0.7065        | 0.7517        | 0.8006        | 0.7882  |
|        | SSR-QC        | 0.8737        | 0.6552        | 0.8539        | 0.7130        | 0.8199        | 0.8860        | 0.7711        | 0.7825        | 0.8585        | 0.8420        | 0.7723        | 0.7194        | 0.7629        | 0.8059        | 0.7940  |
| JPG-SR | <b>0.8803</b> | 0.6709        | <b>0.8602</b> | 0.7312        | <b>0.8232</b> | 0.8875        | 0.7749        | <b>0.7916</b> | <b>0.8590</b> | <b>0.8469</b> | <b>0.7791</b> | <b>0.7294</b> | <b>0.7673</b> | <b>0.8111</b> | <b>0.8009</b> |         |
| 20     | JPEG          | 0.8897        | 0.7772        | 0.8831        | 0.8245        | 0.8621        | 0.9270        | 0.8180        | 0.8483        | 0.8613        | 0.8722        | 0.8395        | 0.8026        | 0.8264        | 0.8597        | 0.8494  |
|        | SA-DCT        | 0.9155        | 0.7788        | 0.9089        | 0.8311        | 0.8754        | 0.9326        | 0.8235        | 0.8605        | 0.8722        | 0.9010        | 0.8585        | 0.7970        | 0.8380        | 0.8715        | 0.8617  |
|        | ANCE          | 0.9182        | 0.7728        | 0.9119        | 0.8264        | 0.8775        | 0.9356        | 0.8346        | 0.8634        | 0.8784        | 0.8990        | 0.8579        | 0.8115        | 0.8390        | 0.8778        | 0.8646  |
|        | BM3D          | 0.9133        | 0.7833        | 0.9130        | 0.8327        | 0.8789        | 0.9351        | 0.8306        | 0.8646        | 0.8770        | 0.8998        | 0.8600        | 0.8098        | 0.8439        | 0.8751        | 0.8655  |
|        | WNNM          | 0.9143        | 0.7757        | 0.9152        | 0.8256        | 0.8771        | 0.9380        | 0.8184        | 0.8549        | 0.8740        | 0.9012        | 0.8544        | 0.7839        | 0.8422        | 0.8817        | 0.8612  |
|        | SSR-QC        | 0.9160        | 0.7722        | 0.9229        | 0.8204        | 0.8831        | 0.9362        | 0.8291        | 0.8583        | 0.8804        | 0.9007        | 0.8557        | 0.8028        | 0.8458        | 0.8857        | 0.8650  |
| JPG-SR | <b>0.9197</b> | <b>0.7878</b> | <b>0.9239</b> | <b>0.8356</b> | <b>0.8856</b> | <b>0.9388</b> | <b>0.8390</b> | <b>0.8687</b> | <b>0.8810</b> | <b>0.9021</b> | <b>0.8616</b> | <b>0.8179</b> | <b>0.8496</b> | <b>0.8911</b> | <b>0.8716</b> |         |
| 30     | JPEG          | 0.9166        | 0.8268        | 0.9173        | 0.8647        | 0.8938        | 0.9471        | 0.8567        | 0.8859        | 0.8824        | 0.9021        | 0.8760        | 0.8462        | 0.8646        | 0.8968        | 0.8841  |
|        | SA-DCT        | 0.9361        | 0.8314        | 0.9345        | 0.8728        | 0.9031        | 0.9506        | 0.8551        | 0.8949        | 0.8871        | 0.9225        | 0.8917        | 0.8412        | 0.8746        | 0.9053        | 0.8929  |
|        | ANCE          | 0.9377        | 0.8261        | 0.9387        | 0.8680        | 0.9043        | 0.9534        | 0.8645        | 0.8968        | 0.8943        | 0.9227        | 0.8906        | 0.8523        | 0.8755        | 0.9128        | 0.8956  |
|        | BM3D          | 0.9357        | 0.8335        | 0.9377        | 0.8732        | 0.9055        | 0.9523        | 0.8612        | 0.8977        | 0.8904        | 0.9220        | 0.8923        | 0.8496        | 0.8784        | 0.9076        | 0.8955  |
|        | WNNM          | 0.9352        | 0.8315        | 0.9393        | 0.8717        | 0.9052        | 0.9548        | 0.8483        | 0.8927        | 0.8852        | 0.9232        | 0.8906        | 0.8293        | 0.8800        | 0.9142        | 0.8930  |
|        | SSR-QC        | <b>0.9379</b> | 0.8279        | 0.9447        | 0.8665        | 0.9082        | 0.9543        | 0.8601        | 0.8938        | 0.8959        | 0.9239        | 0.8902        | 0.8439        | 0.8819        | 0.9179        | 0.8962  |
| JPG-SR | 0.9375        | <b>0.8355</b> | <b>0.9466</b> | <b>0.8741</b> | <b>0.9110</b> | <b>0.9557</b> | <b>0.8663</b> | <b>0.8998</b> | <b>0.8976</b> | <b>0.9241</b> | <b>0.8926</b> | <b>0.8556</b> | <b>0.8835</b> | <b>0.9230</b> | <b>0.9002</b> |         |
| 40     | JPEG          | 0.9306        | 0.8570        | 0.9353        | 0.8883        | 0.9124        | 0.9573        | 0.8788        | 0.9058        | 0.8981        | 0.9180        | 0.8970        | 0.8702        | 0.8857        | 0.9163        | 0.9036  |
|        | SA-DCT        | 0.9446        | 0.8625        | 0.9481        | 0.8963        | 0.9204        | 0.9599        | 0.8764        | 0.9139        | 0.8988        | 0.9352        | 0.9101        | 0.8686        | 0.8950        | 0.9225        | 0.9109  |
|        | ANCE          | 0.9483        | 0.8593        | 0.9524        | 0.8925        | 0.9208        | 0.9623        | 0.8849        | 0.9153        | 0.9056        | 0.9360        | 0.9096        | 0.8767        | 0.8962        | 0.9308        | 0.9136  |
|        | BM3D          | 0.9445        | 0.8637        | 0.9507        | 0.8962        | 0.9220        | 0.9609        | 0.8814        | 0.9157        | 0.9015        | 0.9346        | 0.9104        | 0.8743        | 0.8974        | 0.9244        | 0.9127  |
|        | WNNM          | 0.9433        | 0.8635        | 0.9522        | 0.8966        | 0.9218        | 0.9631        | 0.8717        | 0.9125        | 0.8943        | 0.9357        | 0.9095        | 0.8613        | 0.8999        | 0.9298        | 0.9111  |
|        | SSR-QC        | 0.9470        | 0.8599        | <b>0.9572</b> | 0.8903        | 0.9236        | 0.9632        | 0.8791        | 0.9111        | 0.9072        | 0.9366        | 0.9078        | 0.8673        | 0.9015        | 0.9351        | 0.9134  |
| JPG-SR | <b>0.9484</b> | <b>0.8661</b> | 0.9570        | <b>0.8969</b> | <b>0.9260</b> | <b>0.9642</b> | <b>0.8862</b> | <b>0.9171</b> | <b>0.9093</b> | <b>0.9370</b> | <b>0.9115</b> | <b>0.8784</b> | <b>0.9026</b> | <b>0.9382</b> | <b>0.9171</b> |         |

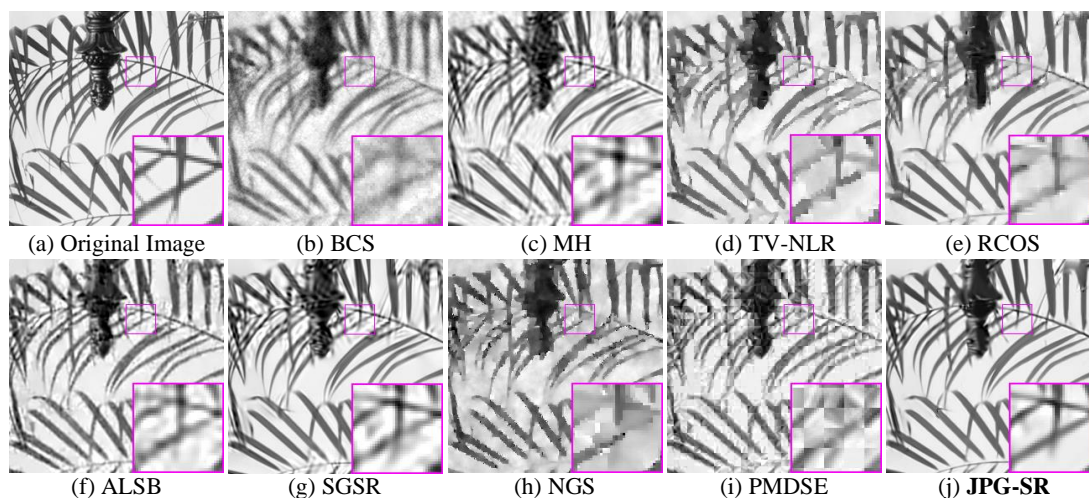

Figure 5: Visual comparison of *Leave* for image CS recovery with  $0.1N$  measurements. (a) Original image; (b) BCS (PSNR = 18.55dB, SSIM = 0.5797); (c) MH (PSNR = 20.89dB, SSIM = 0.7365); (d) TV-NLR (PSNR = 19.36dB, SSIM = 0.7067); (e) RCOS (PSNR = 21.97dB, SSIM = 0.8264); (f) ALSB (PSNR = 21.61dB, SSIM = 0.7961); (g) SGSR (PSNR = 22.39dB, SSIM = 0.8451); (h) NGS (PSNR= 17.87dB, SSIM = 0.6501); (i) PMDSE (PSNR= 18.13dB, SSIM = 0.6184); (j) JPG-SR (PSNR= **25.37dB**, SSIM = **0.9087**).

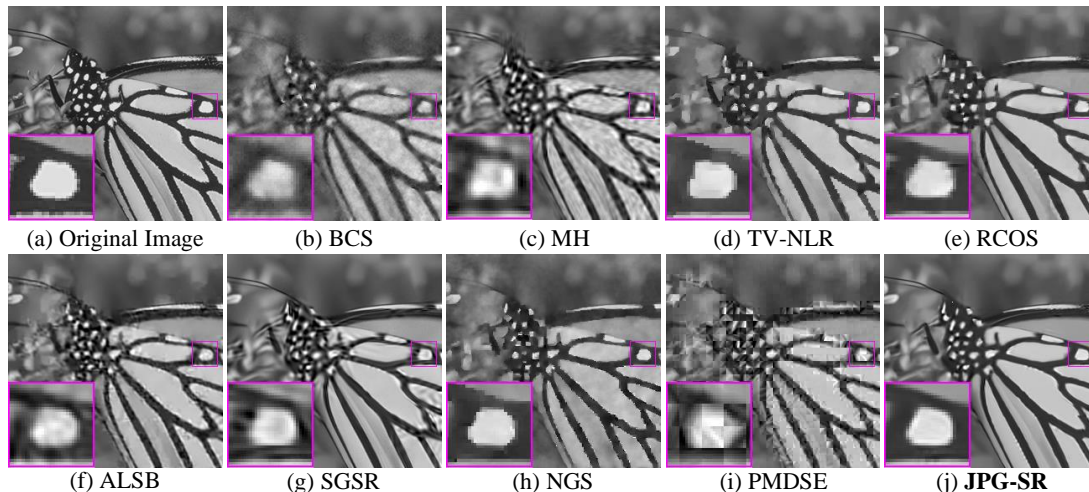

Figure 6: Visual comparison of *Monarch* for image CS recovery with  $0.1N$  measurements. (a) Original image; (b) BCS (PSNR = 21.96dB, SSIM = 0.7015); (c) MH (PSNR = 23.19dB, SSIM = 0.7575); (d) TV-NLR (PSNR = 23.37dB, SSIM = 0.7845); (e) RCOS (PSNR = 25.41dB, SSIM = 0.8428); (f) ALSB (PSNR = 24.23dB, SSIM = 0.8142); (g) SGSR (PSNR = 24.44dB, SSIM = 0.8373); (h) NGS (PSNR= 22.72dB, SSIM = 0.7776); (i) PMDSE (PSNR= 21.02dB, SSIM = 0.6926); (j) JPG-SR (PSNR= **27.15dB**, SSIM = **0.8833**).

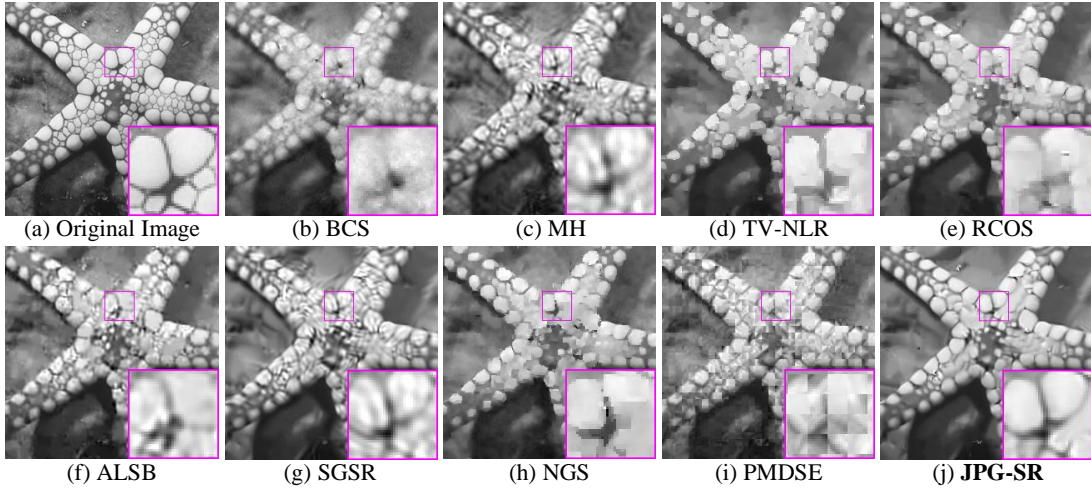

Figure 7: Visual comparison of *Starfish* for image CS recovery with  $0.1N$  measurements. (a) Original image; (b) BCS (PSNR = 22.97dB, SSIM = 0.6687); (c) MH (PSNR = 22.54dB, SSIM = 0.6843); (d) TV-NLR (PSNR = 22.90dB, SSIM = 0.6783); (e) RCOS (PSNR = 23.74dB, SSIM = 0.7146); (f) ALSB (PSNR = 23.61dB, SSIM = 0.7274); (g) SGSR (PSNR = 22.91dB, SSIM = 0.7065); (h) NGS (PSNR = 23.24dB, SSIM = 0.6846); (i) PMDSE (PSNR = 22.07dB, SSIM = 0.6509); (j) JPG-SR (PSNR = **25.10dB**, SSIM = **0.7698**).

Table 3: PSNR (dB) comparison of BCS, MH, TV-NLR, RCOS, ALSB, SGSR, NGS, P-MDSE and JPG-SR for image CS recovery.

| Ratio  | Methods | Airplane     | Couple       | Fence        | Fingerprint  | Flower       | House        | Lake         | Leaves       | Lena         | Man          | Monarch      | Parrot       | Peppers      | Starfish     | Average      |
|--------|---------|--------------|--------------|--------------|--------------|--------------|--------------|--------------|--------------|--------------|--------------|--------------|--------------|--------------|--------------|--------------|
| 0.1    | BCS     | 22.92        | 23.59        | 19.52        | 17.10        | 23.69        | 26.99        | 21.83        | 18.55        | 25.42        | 22.60        | 21.96        | 23.15        | 24.47        | 22.97        | 22.48        |
|        | MH      | 23.67        | 23.56        | 24.02        | 20.26        | 24.15        | 30.28        | 22.17        | 20.89        | 26.13        | 22.92        | 23.19        | 25.34        | 25.33        | 22.54        | 23.89        |
|        | TV-NLR  | 23.59        | 24.12        | 20.03        | 16.48        | 24.71        | 29.75        | 22.84        | 19.36        | 26.37        | 23.43        | 23.37        | 24.90        | 25.62        | 22.90        | 23.39        |
|        | RCOS    | 24.69        | 25.07        | 23.17        | 16.31        | 25.36        | 31.46        | 23.64        | 21.97        | 27.47        | 24.02        | 25.41        | 25.71        | 27.54        | 23.74        | 24.68        |
|        | ALSB    | 24.81        | 24.75        | 25.11        | 20.68        | 24.92        | 32.17        | 23.60        | 21.61        | 27.29        | 23.73        | 24.23        | 26.41        | 26.76        | 23.61        | 24.98        |
|        | SGSR    | 24.23        | 24.44        | 25.64        | 20.47        | 25.09        | 33.06        | 22.62        | 22.39        | 27.11        | 23.62        | 24.44        | 26.06        | 27.08        | 22.91        | 24.94        |
|        | NGS     | 24.46        | 24.44        | 19.92        | 15.78        | 24.99        | 31.25        | 23.05        | 17.87        | 26.58        | 23.87        | 22.72        | 23.65        | 26.52        | 23.24        | 23.45        |
|        | PMDSE   | 22.46        | 22.70        | 18.63        | 16.65        | 22.96        | 26.22        | 21.03        | 18.13        | 23.91        | 21.68        | 21.02        | 24.00        | 22.93        | 22.07        | 21.74        |
|        | JPG-SR  | <b>25.50</b> | <b>25.20</b> | <b>27.02</b> | <b>21.28</b> | <b>26.31</b> | <b>34.05</b> | <b>23.90</b> | <b>25.37</b> | <b>28.05</b> | <b>24.33</b> | <b>27.15</b> | <b>27.53</b> | <b>28.00</b> | <b>25.10</b> | <b>26.34</b> |
|        | 0.2     | BCS          | 25.86        | 25.57        | 21.57        | 18.50        | 25.93        | 30.54        | 24.05        | 21.12        | 28.15        | 24.67        | 25.21        | 26.52        | 27.15        | 25.29        |
| MH     |         | 27.19        | 26.96        | 27.56        | 23.06        | 27.47        | 33.84        | 25.42        | 25.14        | 29.81        | 25.86        | 27.10        | 29.23        | 28.61        | 25.93        | 27.37        |
| TV-NLR |         | 26.54        | 26.37        | 22.21        | 18.04        | 27.39        | 32.99        | 25.29        | 23.47        | 28.94        | 26.04        | 27.27        | 27.27        | 29.39        | 25.59        | 26.20        |
| RCOS   |         | 28.28        | 27.95        | 27.31        | 19.59        | 28.46        | 35.21        | 26.56        | 26.93        | 30.33        | 26.77        | 29.69        | 28.63        | 30.78        | 27.33        | 28.13        |
| ALSB   |         | 28.62        | 28.13        | 28.41        | 23.69        | 28.62        | 36.07        | 27.07        | 27.15        | 30.68        | 26.77        | 28.08        | 29.70        | 29.96        | 27.30        | 28.59        |
| SGSR   |         | 28.07        | 28.25        | 29.42        | 23.60        | 29.21        | 35.81        | 26.59        | 28.79        | 30.89        | 27.00        | 28.76        | 30.60        | 30.51        | 27.19        | 28.91        |
| NGS    |         | 28.18        | 27.27        | 23.65        | 17.90        | 28.17        | 34.79        | 26.36        | 25.40        | 29.60        | 26.65        | 28.90        | 26.60        | 30.56        | 26.78        | 27.20        |
| PMDSE  |         | 24.82        | 24.81        | 22.62        | 19.92        | 25.48        | 29.41        | 23.02        | 21.99        | 27.24        | 24.07        | 23.98        | 25.95        | 25.42        | 24.38        | 24.51        |
| JPG-SR |         | <b>29.45</b> | <b>28.65</b> | <b>29.87</b> | <b>23.91</b> | <b>29.89</b> | <b>36.47</b> | <b>27.33</b> | <b>30.65</b> | <b>31.35</b> | <b>27.67</b> | <b>30.99</b> | <b>31.50</b> | <b>31.17</b> | <b>29.13</b> | <b>29.86</b> |
| 0.3    |         | BCS          | 28.02        | 27.12        | 23.24        | 19.96        | 27.84        | 32.85        | 25.92        | 23.16        | 30.16        | 26.38        | 27.55        | 28.80        | 29.05        | 27.20        |
|        | MH      | 29.67        | 28.61        | 29.42        | 24.80        | 29.47        | 35.69        | 27.19        | 27.63        | 31.99        | 27.62        | 29.20        | 31.01        | 30.20        | 27.90        | 29.31        |
|        | TV-NLR  | 28.51        | 28.35        | 24.72        | 19.74        | 29.18        | 35.63        | 26.47        | 26.43        | 30.09        | 28.06        | 29.80        | 29.12        | 30.81        | 27.94        | 28.20        |
|        | RCOS    | 30.72        | 30.39        | 29.91        | 23.03        | 30.84        | 37.10        | 29.14        | 30.59        | 32.38        | 28.82        | 32.75        | 30.88        | 32.69        | 30.11        | 30.67        |
|        | ALSB    | 31.14        | 30.91        | 30.83        | 25.84        | 31.53        | 38.34        | 29.72        | 31.08        | 33.36        | 28.98        | 31.60        | 32.31        | 32.37        | 30.35        | 31.31        |
|        | SGSR    | 31.04        | 30.72        | 31.56        | 25.84        | 32.16        | 37.37        | 29.31        | 33.00        | 33.26        | 29.22        | 31.99        | 32.52        | 32.71        | 30.79        | 31.53        |
|        | NGS     | 31.07        | 30.14        | 27.61        | 20.25        | 30.60        | 36.43        | 28.68        | 29.10        | 32.45        | 28.67        | 32.53        | 29.47        | 32.90        | 29.87        | 29.98        |
|        | PMDSE   | 26.87        | 26.97        | 25.31        | 22.39        | 27.24        | 32.05        | 25.22        | 24.43        | 29.09        | 26.00        | 26.39        | 28.33        | 27.57        | 26.68        | 26.75        |
|        | JPG-SR  | <b>31.98</b> | <b>31.24</b> | <b>31.85</b> | <b>26.27</b> | <b>32.45</b> | <b>38.45</b> | <b>30.12</b> | <b>33.37</b> | <b>33.95</b> | <b>29.81</b> | <b>33.24</b> | <b>33.32</b> | <b>33.02</b> | <b>31.90</b> | <b>32.21</b> |
|        | 0.4     | BCS          | 29.96        | 28.51        | 24.81        | 21.67        | 29.51        | 34.65        | 27.52        | 25.07        | 32.06        | 27.91        | 29.59        | 30.89        | 30.77        | 28.94        |
| MH     |         | 31.57        | 30.47        | 30.94        | 26.11        | 30.98        | 36.65        | 28.87        | 29.66        | 33.60        | 29.11        | 31.13        | 33.49        | 31.81        | 29.62        | 31.00        |
| TV-NLR |         | 30.11        | 30.87        | 28.18        | 21.25        | 31.91        | 37.33        | 28.91        | 29.87        | 32.17        | 29.74        | 31.90        | 30.77        | 32.18        | 30.44        | 30.40        |
| RCOS   |         | 32.94        | 32.31        | 32.19        | 25.11        | 32.89        | 38.60        | 31.05        | 33.67        | 34.31        | 30.42        | 35.14        | 32.79        | 34.26        | 32.46        | 32.72        |
| ALSB   |         | 33.82        | 33.44        | 32.83        | 27.70        | 34.19        | <b>40.25</b> | 31.99        | 34.57        | 35.47        | 30.99        | 34.42        | 34.85        | 34.44        | 32.98        | 33.71        |
| SGSR   |         | 33.36        | 33.18        | 33.34        | 27.85        | 34.40        | 38.99        | 31.62        | 35.83        | 35.68        | 31.24        | 34.66        | <b>35.81</b> | 34.47        | 33.67        | 33.86        |
| NGS    |         | 33.50        | 32.45        | 30.59        | 22.98        | 33.37        | 37.82        | 31.11        | 32.99        | 35.10        | 30.66        | 35.13        | 32.04        | 34.57        | 32.78        | 32.51        |
| PMDSE  |         | 28.18        | 28.73        | 27.66        | 24.22        | 29.06        | 33.94        | 26.20        | 26.81        | 30.97        | 27.72        | 27.48        | 30.41        | 28.94        | 28.24        | 28.47        |
| JPG-SR |         | <b>34.18</b> | <b>33.76</b> | <b>33.71</b> | <b>28.27</b> | <b>34.69</b> | 40.19        | <b>32.31</b> | <b>36.06</b> | <b>35.95</b> | <b>31.64</b> | <b>35.63</b> | 35.76        | <b>34.67</b> | <b>34.46</b> | <b>34.38</b> |



Table 4: SSIM comparison of BCS, MH, TV-NLR, RCOS, ALSB, SGSR, NGS, PMDSE and JPG-SR for image CS recovery.

| Ratio | Methods | Airplane      | Couple        | Fence         | Fingerprint   | Flower        | House         | Lake          | Leaves        | Lena          | Man           | Monarch       | Parrot        | Pepper        | Starfish      | Average       |
|-------|---------|---------------|---------------|---------------|---------------|---------------|---------------|---------------|---------------|---------------|---------------|---------------|---------------|---------------|---------------|---------------|
| 0.1   | BCS     | 0.7200        | 0.5944        | 0.4956        | 0.3434        | 0.6210        | 0.7681        | 0.6040        | 0.5797        | 0.7420        | 0.5607        | 0.7015        | 0.7941        | 0.6956        | 0.6687        | 0.6349        |
|       | MH      | 0.7638        | 0.6482        | 0.7317        | 0.7220        | 0.6782        | 0.8357        | 0.6435        | 0.7365        | 0.7976        | 0.5837        | 0.7575        | 0.8219        | 0.7258        | 0.6843        | 0.7236        |
|       | TV-NLR  | 0.7680        | 0.6454        | 0.5577        | 0.3373        | 0.7128        | 0.8347        | 0.7013        | 0.7067        | 0.7941        | 0.6330        | 0.7845        | 0.8302        | 0.7600        | 0.6783        | 0.6960        |
|       | RCOS    | 0.7971        | 0.7005        | 0.6882        | 0.3539        | 0.7444        | 0.8525        | 0.7368        | 0.8264        | 0.8227        | 0.6554        | 0.8428        | 0.8453        | 0.8010        | 0.7146        | 0.7415        |
|       | ALSB    | 0.8146        | 0.7015        | 0.7692        | 0.7391        | 0.7403        | 0.8617        | 0.7419        | 0.7961        | 0.8301        | 0.6526        | 0.8142        | 0.8566        | 0.7820        | 0.7274        | 0.7734        |
|       | SGSR    | 0.7982        | 0.7119        | 0.7929        | 0.7412        | 0.7517        | 0.8673        | 0.6961        | 0.8451        | 0.8360        | 0.6540        | 0.8373        | 0.8583        | 0.7973        | 0.7065        | 0.7781        |
|       | NGS     | 0.7782        | 0.6503        | 0.5467        | 0.3124        | 0.7077        | 0.8439        | 0.6941        | 0.6501        | 0.7888        | 0.6403        | 0.7776        | 0.8303        | 0.7711        | 0.6846        | 0.6911        |
|       | PMDSE   | 0.7317        | 0.6041        | 0.5024        | 0.4589        | 0.6492        | 0.7574        | 0.6410        | 0.6184        | 0.7179        | 0.5818        | 0.6926        | 0.7837        | 0.6747        | 0.6509        | 0.6475        |
|       | JPG-SR  | <b>0.8262</b> | <b>0.7232</b> | <b>0.7981</b> | <b>0.7476</b> | <b>0.7849</b> | <b>0.8742</b> | <b>0.7488</b> | <b>0.9087</b> | <b>0.8469</b> | <b>0.6847</b> | <b>0.8833</b> | <b>0.8749</b> | <b>0.8123</b> | <b>0.7698</b> | <b>0.8060</b> |
| 0.2   | BCS     | 0.8089        | 0.6979        | 0.6232        | 0.5461        | 0.7246        | 0.8395        | 0.6988        | 0.7047        | 0.8277        | 0.6730        | 0.7998        | 0.8659        | 0.7750        | 0.7678        | 0.7395        |
|       | MH      | 0.8525        | 0.7934        | 0.8355        | 0.8412        | 0.8019        | 0.8934        | 0.7713        | 0.8608        | 0.8806        | 0.7359        | 0.8660        | 0.8975        | 0.8156        | 0.7972        | 0.8316        |
|       | TV-NLR  | 0.8568        | 0.7700        | 0.6949        | 0.5313        | 0.8216        | 0.8802        | 0.7980        | 0.8619        | 0.8656        | 0.7560        | 0.8808        | 0.8843        | 0.8457        | 0.7963        | 0.8031        |
|       | RCOS    | 0.8842        | 0.8216        | 0.8279        | 0.6416        | 0.8484        | 0.8937        | 0.8332        | 0.9310        | 0.8894        | 0.7730        | 0.9213        | 0.8998        | 0.8639        | 0.8392        | 0.8477        |
|       | ALSB    | 0.8977        | 0.8419        | 0.8557        | <b>0.8650</b> | 0.8617        | <b>0.9165</b> | 0.8477        | 0.9299        | 0.9041        | 0.7886        | 0.9025        | 0.9128        | 0.8537        | 0.8471        | 0.8732        |
|       | SGSR    | 0.8827        | 0.8466        | <b>0.8754</b> | 0.8641        | 0.8716        | 0.9017        | 0.8345        | 0.9487        | 0.9049        | 0.7998        | 0.9162        | 0.9125        | 0.8639        | 0.8391        | 0.8758        |
|       | NGS     | 0.8789        | 0.7914        | 0.7342        | 0.5298        | 0.8301        | 0.8904        | 0.8170        | 0.8955        | 0.8718        | 0.7721        | 0.9002        | 0.8879        | 0.8571        | 0.8190        | 0.8197        |
|       | PMDSE   | 0.8146        | 0.7349        | 0.7082        | 0.7145        | 0.7633        | 0.8296        | 0.7390        | 0.8009        | 0.8341        | 0.7177        | 0.8122        | 0.8503        | 0.7661        | 0.7684        | 0.7753        |
|       | JPG-SR  | <b>0.9028</b> | <b>0.8489</b> | 0.8689        | 0.8579        | <b>0.8806</b> | 0.9126        | <b>0.8499</b> | <b>0.9635</b> | <b>0.9087</b> | <b>0.8070</b> | <b>0.9381</b> | <b>0.9187</b> | <b>0.8721</b> | <b>0.8771</b> | <b>0.8862</b> |
| 0.3   | BCS     | 0.8631        | 0.7685        | 0.7148        | 0.6880        | 0.7943        | 0.8781        | 0.7654        | 0.7768        | 0.8764        | 0.7504        | 0.8533        | 0.9017        | 0.8217        | 0.8287        | 0.8058        |
|       | MH      | 0.8944        | 0.8388        | 0.8786        | 0.8932        | 0.8555        | 0.9186        | 0.8227        | 0.9040        | 0.9154        | 0.8003        | 0.9005        | 0.9254        | 0.8513        | 0.8506        | 0.8749        |
|       | TV-NLR  | 0.8989        | 0.8456        | 0.7981        | 0.6892        | 0.8765        | 0.9109        | 0.8446        | 0.9233        | 0.8969        | 0.8349        | 0.9228        | 0.9140        | 0.8774        | 0.8667        | 0.8643        |
|       | RCOS    | 0.9248        | 0.8897        | 0.8862        | 0.8279        | 0.9031        | 0.9200        | 0.8926        | 0.9642        | 0.9248        | 0.8406        | 0.9534        | 0.9271        | 0.8967        | 0.9021        | 0.9038        |
|       | ALSB    | 0.9336        | 0.9087        | 0.9088        | 0.9167        | 0.9201        | <b>0.9465</b> | 0.9040        | 0.9664        | 0.9407        | 0.8645        | 0.9464        | 0.9401        | 0.8951        | 0.9113        | 0.9216        |
|       | SGSR    | 0.9241        | 0.9016        | <b>0.9153</b> | 0.9168        | 0.9216        | 0.9257        | 0.8951        | 0.9740        | 0.9359        | 0.8646        | 0.9488        | 0.9344        | 0.8978        | 0.9091        | 0.9189        |
|       | NGS     | 0.9245        | 0.8776        | 0.8509        | 0.7189        | 0.8926        | 0.9138        | 0.8792        | 0.9485        | 0.9209        | 0.8393        | 0.9460        | 0.9223        | 0.8946        | 0.8915        | 0.8872        |
|       | PMDSE   | 0.8707        | 0.8181        | 0.8039        | 0.8197        | 0.8309        | 0.8872        | 0.8143        | 0.8667        | 0.8837        | 0.7966        | 0.8705        | 0.8931        | 0.8242        | 0.8396        | 0.8442        |
|       | JPG-SR  | <b>0.9379</b> | <b>0.9089</b> | 0.9153        | <b>0.9183</b> | <b>0.9271</b> | 0.9439        | <b>0.9080</b> | <b>0.9782</b> | <b>0.9425</b> | <b>0.8756</b> | <b>0.9579</b> | <b>0.9407</b> | <b>0.9025</b> | <b>0.9279</b> | <b>0.9275</b> |
| 0.4   | BCS     | 0.8995        | 0.8208        | 0.7834        | 0.7954        | 0.8432        | 0.9050        | 0.8156        | 0.8289        | 0.9103        | 0.8088        | 0.8898        | 0.9281        | 0.8591        | 0.8732        | 0.8544        |
|       | MH      | 0.9287        | 0.8904        | 0.9072        | 0.9210        | 0.8900        | 0.9212        | 0.8620        | 0.9289        | 0.9351        | 0.8485        | 0.9237        | 0.9379        | 0.8831        | 0.8859        | 0.9045        |
|       | TV-NLR  | 0.9266        | 0.9045        | 0.8779        | 0.7867        | 0.9228        | 0.9322        | 0.8943        | 0.9591        | 0.9295        | 0.8735        | 0.9475        | 0.9347        | 0.9011        | 0.9171        | 0.9077        |
|       | RCOS    | 0.9487        | 0.9248        | 0.9222        | 0.8916        | 0.9346        | 0.9405        | 0.9251        | 0.9802        | 0.9477        | 0.8822        | 0.9678        | 0.9456        | 0.9180        | 0.9366        | 0.9333        |
|       | ALSB    | <b>0.9586</b> | 0.9448        | 0.9374        | 0.9461        | 0.9516        | <b>0.9633</b> | 0.9352        | 0.9826        | 0.9589        | 0.9087        | 0.9659        | 0.9567        | 0.9225        | 0.9458        | 0.9484        |
|       | SGSR    | 0.9474        | 0.9370        | 0.9388        | 0.9468        | 0.9472        | 0.9475        | 0.9277        | 0.9836        | 0.9568        | 0.9073        | 0.9651        | 0.9531        | 0.9204        | 0.9414        | 0.9443        |
|       | NGS     | 0.9503        | 0.9218        | 0.9035        | 0.8415        | 0.9360        | 0.9332        | 0.9216        | 0.9743        | 0.9493        | 0.8890        | 0.9644        | 0.9440        | 0.9173        | 0.9331        | 0.9271        |
|       | PMDSE   | 0.8977        | 0.8760        | 0.8609        | 0.8825        | 0.8763        | 0.9172        | 0.8446        | 0.9108        | 0.9163        | 0.8531        | 0.8959        | 0.9212        | 0.8591        | 0.8812        | 0.8852        |
|       | JPG-SR  | 0.9583        | <b>0.9449</b> | <b>0.9420</b> | <b>0.9491</b> | <b>0.9530</b> | 0.9609        | <b>0.9377</b> | <b>0.9868</b> | <b>0.9607</b> | <b>0.9143</b> | <b>0.9712</b> | <b>0.9575</b> | <b>0.9241</b> | <b>0.9545</b> | <b>0.9511</b> |

## References

- Chen Chen, Eric W Tramel, and James E Fowler. Compressed-sensing recovery of images and video using multihypothesis predictions. In *Signals, Systems and Computers (ASILOMAR), 2011 Conference Record of the Forty Fifth Asilomar Conference on*, pages 1193–1198. IEEE, 2011.
- Kostadin Dabov, Alessandro Foi, Vladimir Katkovnik, and Karen Egiazarian. Image denoising by sparse 3-d transform-domain collaborative filtering. *IEEE Transactions on image processing*, 16(8):2080–2095, 2007.
- Alessandro Foi, Vladimir Katkovnik, and Karen Egiazarian. Pointwise shape-adaptive dct for high-quality denoising and deblocking of grayscale and color images. *IEEE Transactions on Image Processing*, 16(5):1395–1411, 2007.
- Shuhang Gu, Lei Zhang, Wangmeng Zuo, and Xiangchu Feng. Weighted nuclear norm minimization with application to image denoising. In *Proceedings of the IEEE Conference on Computer Vision and Pattern Recognition*, pages 2862–2869, 2014.
- Hangfan Liu, Ruiqin Xiong, Xinfeng Zhang, Yongbing Zhang, Siwei Ma, and Wen Gao. Nonlocal gradient sparsity regularization for image restoration. *IEEE Transactions on Circuits and Systems for Video Technology*, 27(9):1909–1921, 2017.

- Sungkwang Mun and James E Fowler. Block compressed sensing of images using directional transforms. In *Image Processing (ICIP), 2009 16th IEEE International Conference on*, pages 3021–3024. IEEE, 2009.
- Jiao Wu, Feilong Cao, and Juncheng Yin. Nonlocally multi-morphological representation for image reconstruction from compressive measurements. *IEEE Transactions on Image Processing*, 26(12):5730–5742, 2017.
- Jian Zhang, Debin Zhao, Chen Zhao, Ruiqin Xiong, Siwei Ma, and Wen Gao. Image compressive sensing recovery via collaborative sparsity. *IEEE Journal on Emerging and Selected Topics in Circuits and Systems*, 2(3):380–391, 2012.
- Jian Zhang, Shaohui Liu, Ruiqin Xiong, Siwei Ma, and Debin Zhao. Improved total variation based image compressive sensing recovery by nonlocal regularization. In *Circuits and Systems (ISCAS), 2013 IEEE International Symposium on*, pages 2836–2839. IEEE, 2013a.
- Jian Zhang, Debin Zhao, Feng Jiang, and Wen Gao. Structural group sparse representation for image compressive sensing recovery. In *Data Compression Conference (DCC), 2013*, pages 331–340. IEEE, 2013b.
- Jian Zhang, Chen Zhao, Debin Zhao, and Wen Gao. Image compressive sensing recovery using adaptively learned sparsifying basis via  $l_0$  minimization. *Signal Processing*, 103:114–126, 2014.
- Xinfeng Zhang, Ruiqin Xiong, Xiaopeng Fan, Siwei Ma, and Wen Gao. Compression artifact reduction by overlapped-block transform coefficient estimation with block similarity. *IEEE transactions on image processing*, 22(12):4613–4626, 2013c.
- Chen Zhao, Jian Zhang, Siwei Ma, Xiaopeng Fan, Yongbing Zhang, and Wen Gao. Reducing image compression artifacts by structural sparse representation and quantization constraint prior. *IEEE Transactions on Circuits and Systems for Video Technology*, 27(10):2057–2071, 2017.
